# Supplementary material for: Midkine Is a Potential Therapeutic Target of Tumorigenesis, Angiogenesis, and Metastasis in Non-Small Cell Lung Cancer
Source: MDPI journal article supplement (doi:10.3390/cancers12092402), 2020-08-24

# Supplementary Materials: Midkine is a Potential Therapeutic Target of Tumorigenesis, Angiogenesis, and Metastasis in Non-Small Cell Lung Cancer

Dong Hoon Shin, Jeong Yeon Jo, Sun Ha Kim, Minyoung Choi, Chungyong Han, Beom K. Choi and Sang Soo Kim

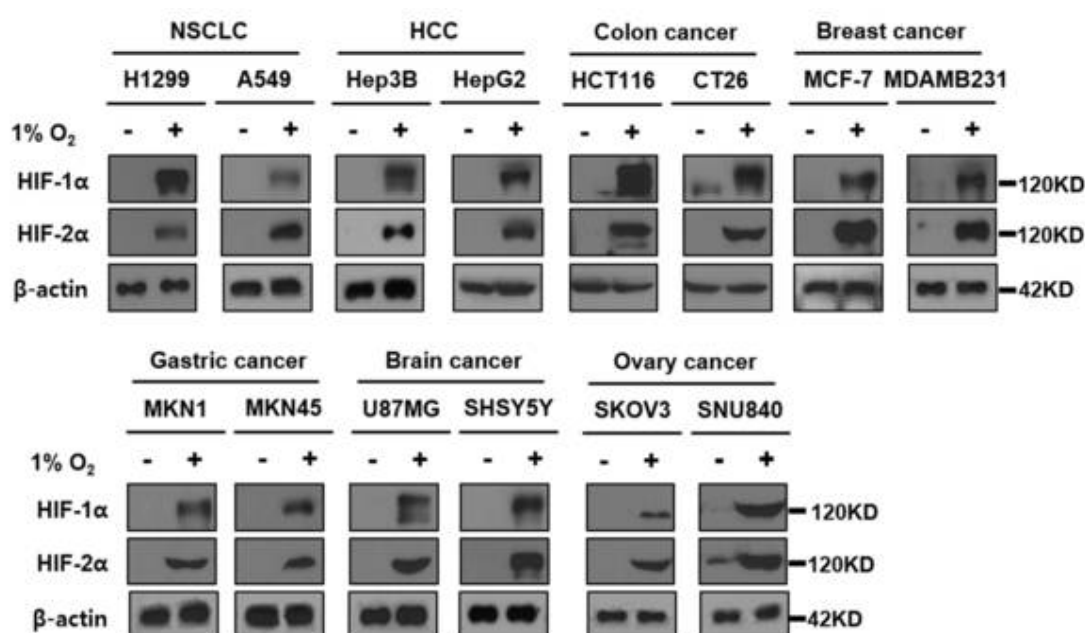

**Figure S1.** Expression levels HIF-1α and HIF-2α. H1299, A549 (NSCLC); Hep3B, HepG2 (HCC); HCT116, CT26 (Colon cancer); MCF7, MDAMB231 (Breast cancer); MKN1, MKN45 (Gastric cancer); U87MG, SHSY5Y (Brain cancer); and SKOV3, SNU840 (Ovary cancer) cells were incubated for 16 h under normoxic (20% O<sub>2</sub>) or hypoxic (1% O<sub>2</sub>) conditions. HIF-1α, HIF-2α and β-actin expressions were analyzed by immunoblotting.

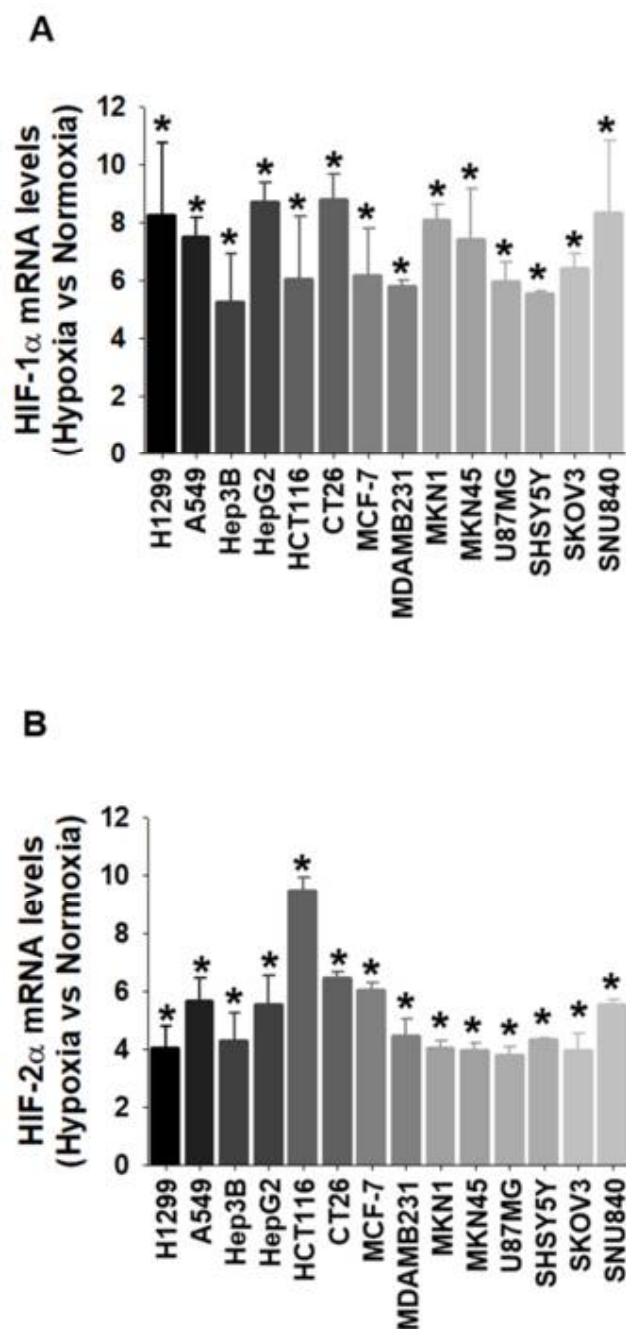

**Figure S2.** Measurements of mRNA levels of HIF-1 $\alpha$  and HIF-2 $\alpha$  under the same conditions as mentioned in Figure S1. Student's *t*-test was performed and values displayed as average  $\pm$ SEM;  $n = 6$ , \*  $p < 0.05$ .

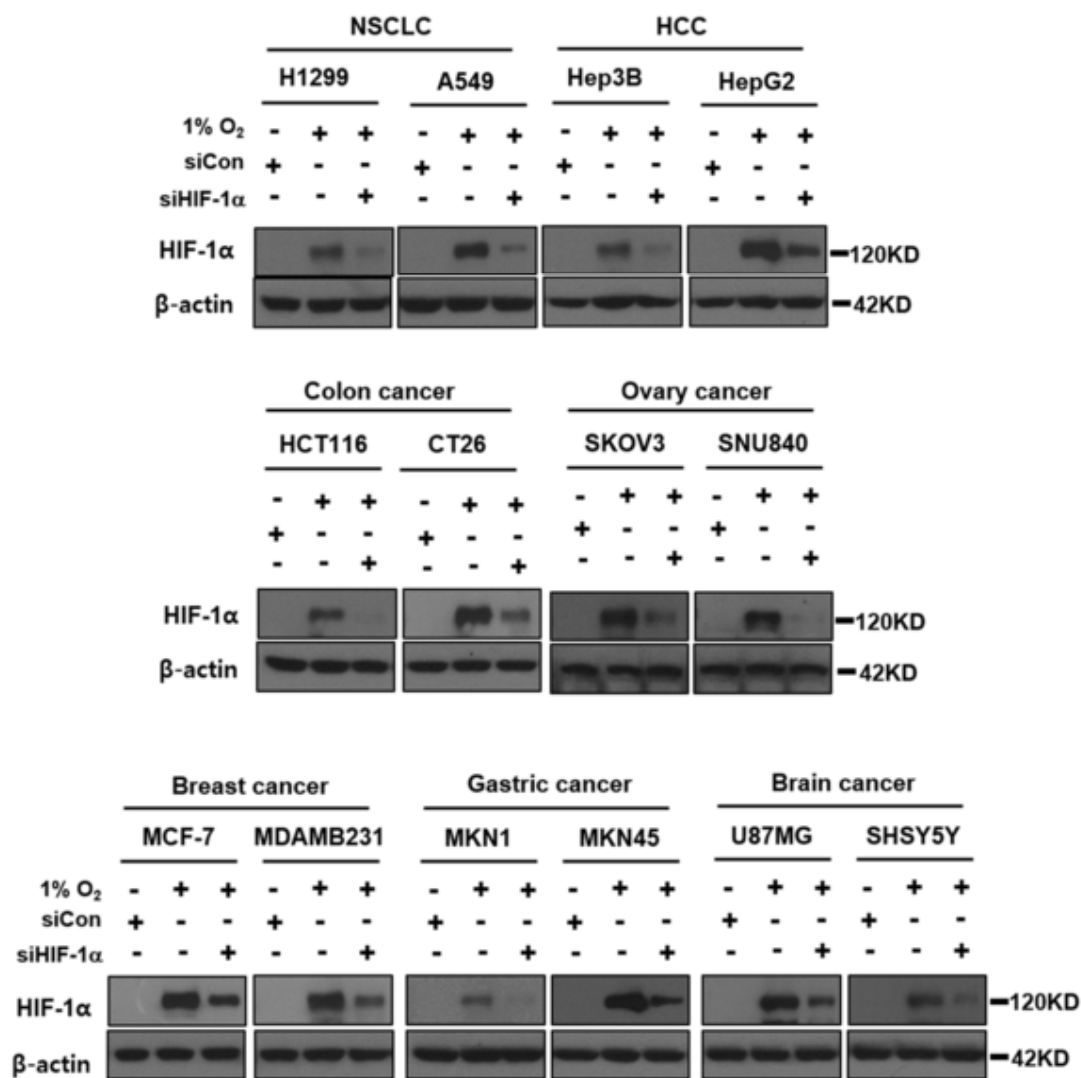

**Figure S3.** Expression levels of HIF-1α. H1299 and A549 (NSCLC); Hep3B, HepG2 (HCC); HCT116, CT26 (Colon cancer); SKOV3, SNU840 (Ovary cancer); MCF-7, MDAMB231 (Breast cancer); MKN1, MKN45 (Gastric cancer); and U87MG, SHSY5Y (Brain cancer) cells were transfected with siCon and siHIF-1α under normoxic or hypoxic conditions. HIF-1α and β-actin expressions were analyzed by immunoblotting.

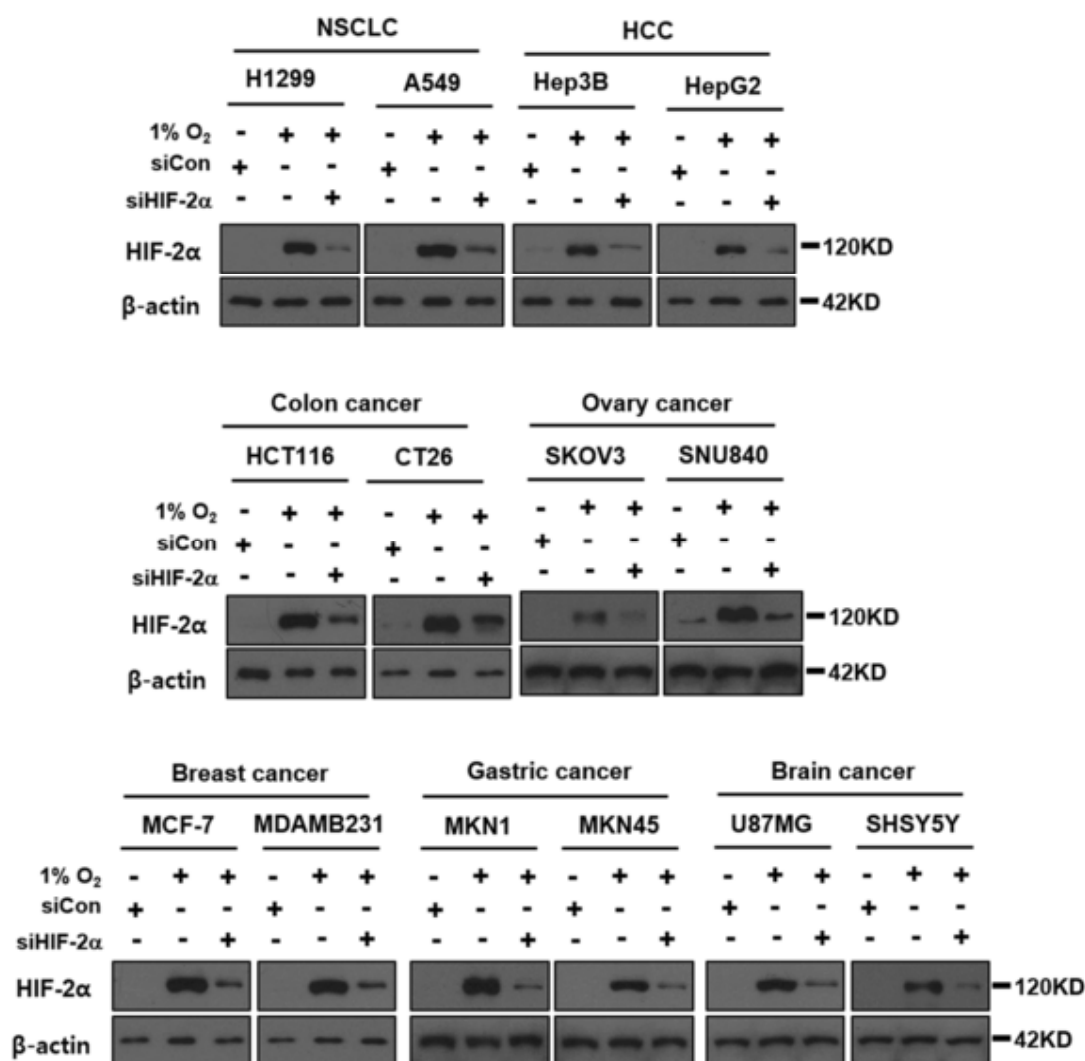

**Figure S4.** Expression of HIF-2 $\alpha$ . The same cells as mentioned in Figure S3 were transfected with siCon and siHIF-2 $\alpha$  under normoxic or hypoxic conditions. HIF-2 $\alpha$  and  $\beta$ -actin expressions were analyzed by immunoblotting.

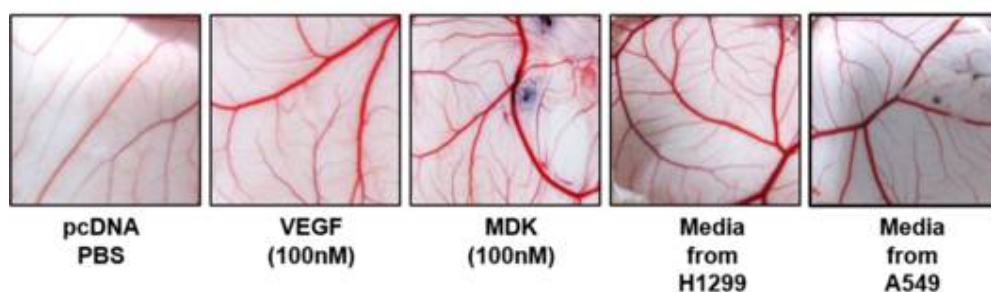

**Figure S5.** Images displaying angiogenic activity of MDK in CAM. CM were collected from H1299 and A549 overexpressing MDK. To measure angiogenic activity of MDK, PBS, rhVEGF165 (100ng/ml, positive control), rhMDK (100ng/ml) and CM from H1299 and A549 were added on Day 0. The images are presented as representative blood vessel branches for each group of CAM at Day 5 of incubation.

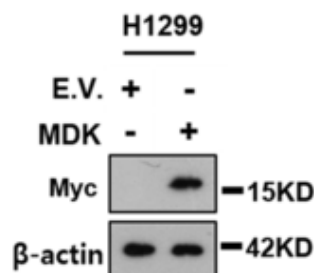

**Figure S6.** H1299 cells were transfected with E.V. and Myc-DDK-MDK which were selected by G418 (400 µg/ml) until colony formation. Expressing E.V. and MDK were analyzed by immunoblotting.

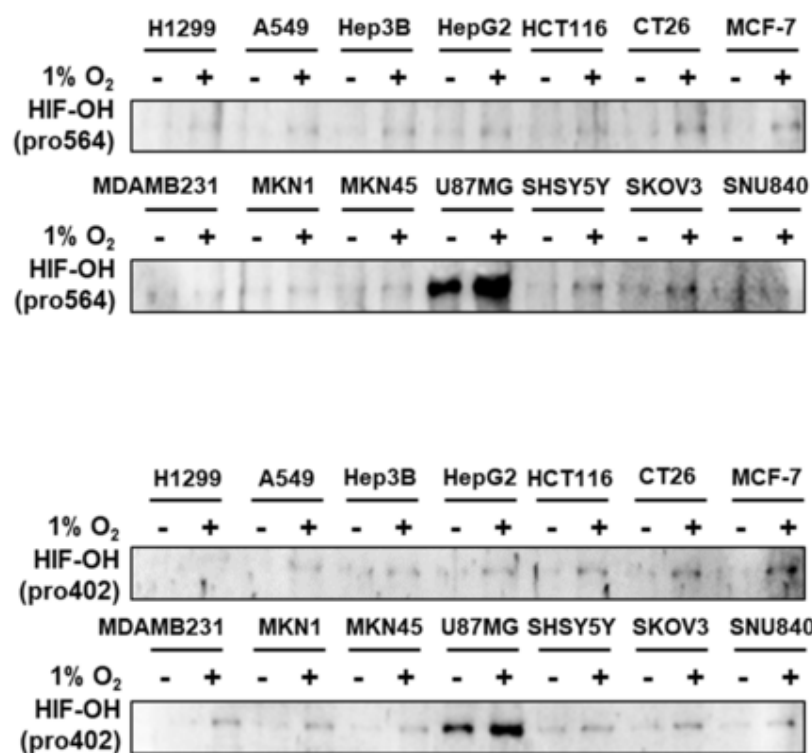

**Figure S7.** Expression levels Pro564 and Pro402 of HIF-1α. H1299, A549 (NSCLC); Hep3B, HepG2 (HCC); HCT116, CT26 (Colon cancer); MCF7, MDAMB231 (Breast cancer); MKN1, MKN45 (Gastric cancer); U87MG, SHSY5Y (Brain cancer); and SKOV3, SNU840 (Ovary cancer) cells were incubated for 16 h under normoxic (20% O<sub>2</sub>) or hypoxic (1% O<sub>2</sub>) conditions. Pro564 and Pro402 of HIF-1α and β-actin expressions were analyzed by immunoblotting.

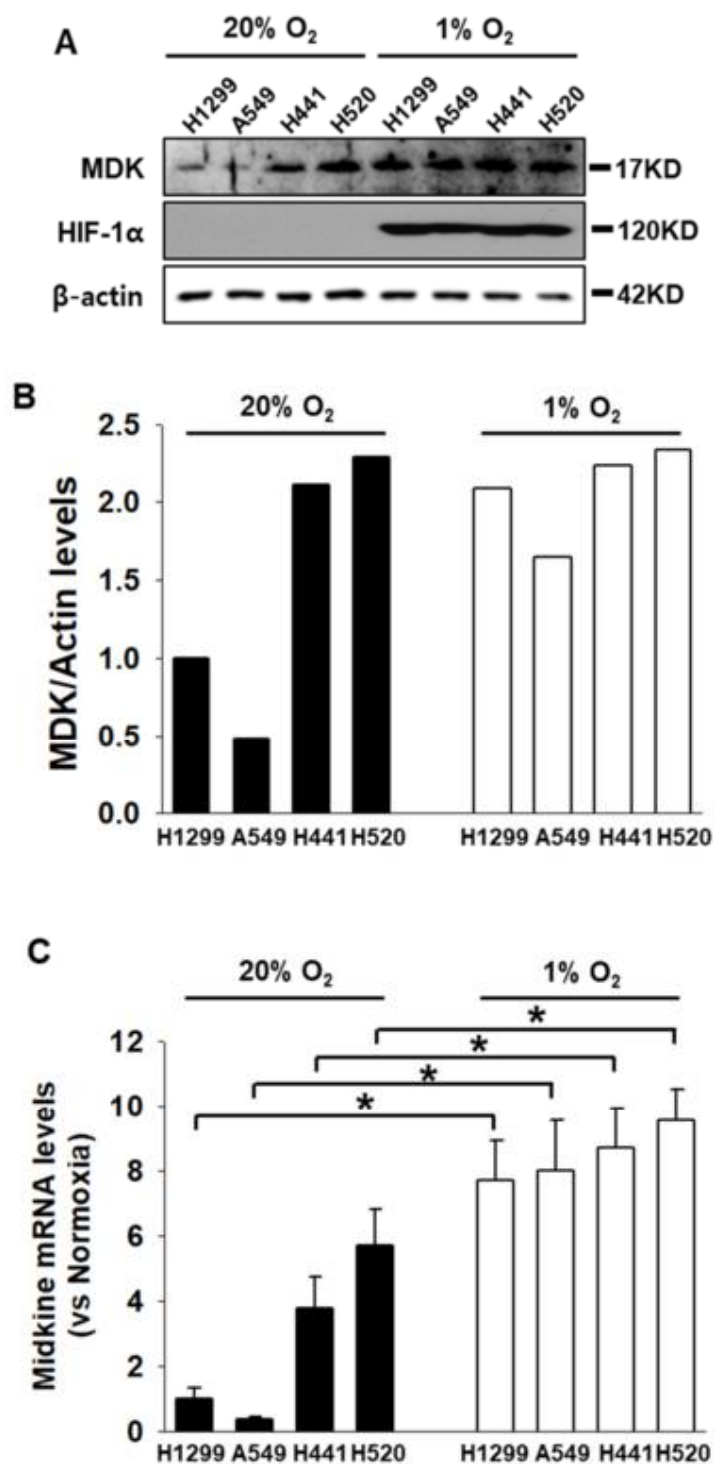

**Figure S8.** Measurements of protein and mRNA levels of MDK under normoxic (20% O<sub>2</sub>) or hypoxic (1% O<sub>2</sub>) conditions with H1299, A549, H441, and H520. A. Immunoblotting of MDK, HIF-1α, and β-actin. B. Graph of MDK levels normalized by β-actin levels. C. mRNA levels of MDK. Student's *t* test was performed and values displayed as average ±SD; *n* = 6, \* *p* < 0.05.

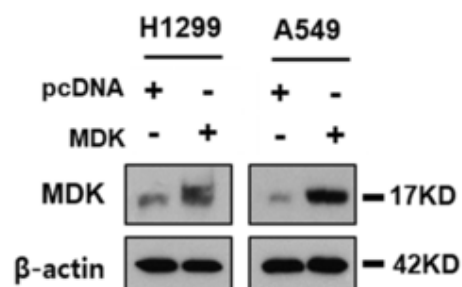

**Figure S9.** Expression levels of MDK. H1299 and A549 cells were transfected with pcDNA and MDK and then MDK and  $\beta$ -actin expressions were analyzed by immunoblotting.

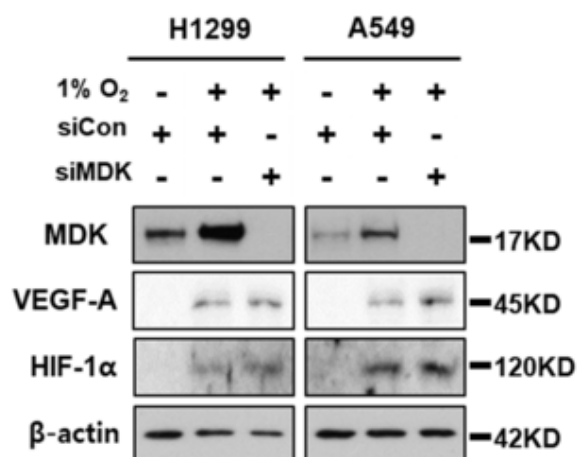

**Figure S10.** MDK did not regulate VEGF-A. H1299 and A549 cells were transfected with siCon and siMDK under normoxic or hypoxic conditions. MDK, VEGF-A, HIF-1 $\alpha$ , and  $\beta$ -actin expressions were analyzed by immunoblotting.

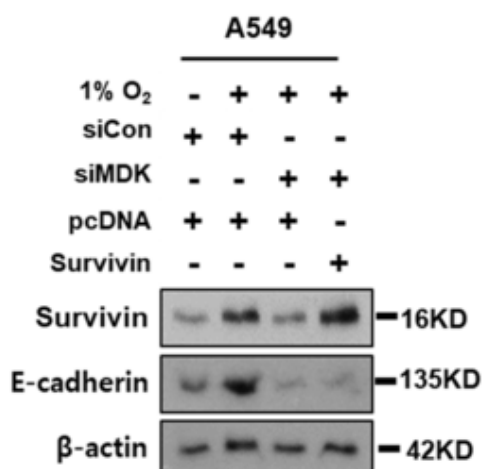

**Figure S11.** Survivin did not regulate EMT signaling. A549 cells were transfected with siCon, siMDK, pcDNA, and survivin. Survivin, E-cadherin, and  $\beta$ -actin expressions were analyzed by immunoblotting.

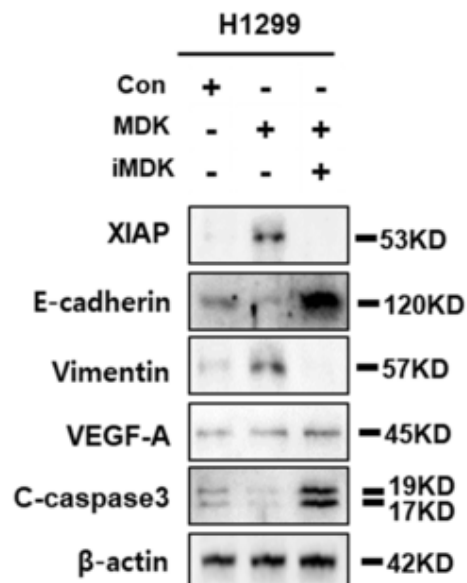

**Figure S12.** Western blotting with xenograft in vivo samples. Con, MDK, and MDK+iMDK samples from H1299 xenograft in vivo model in Figure 5. analyzed XIAP, E-cadherin, vimentin, VEGF-A, cleaved-caspase 3 and  $\beta$ -actin by using Immunoblotting assay.

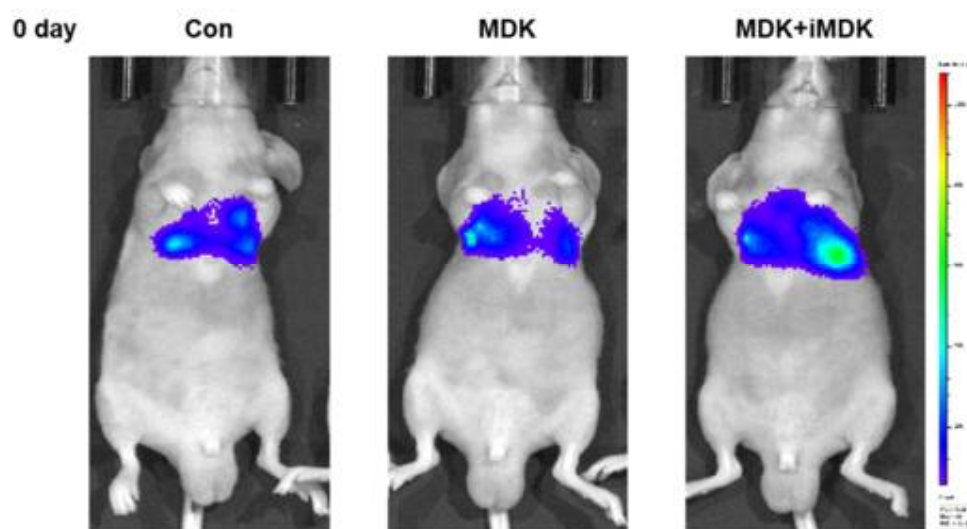

**Figure S13.** Representative Bio-luminescence images at 0 days for control, MDK, and iMDK are shown, revealing a BLI signal originating from the site of injection.



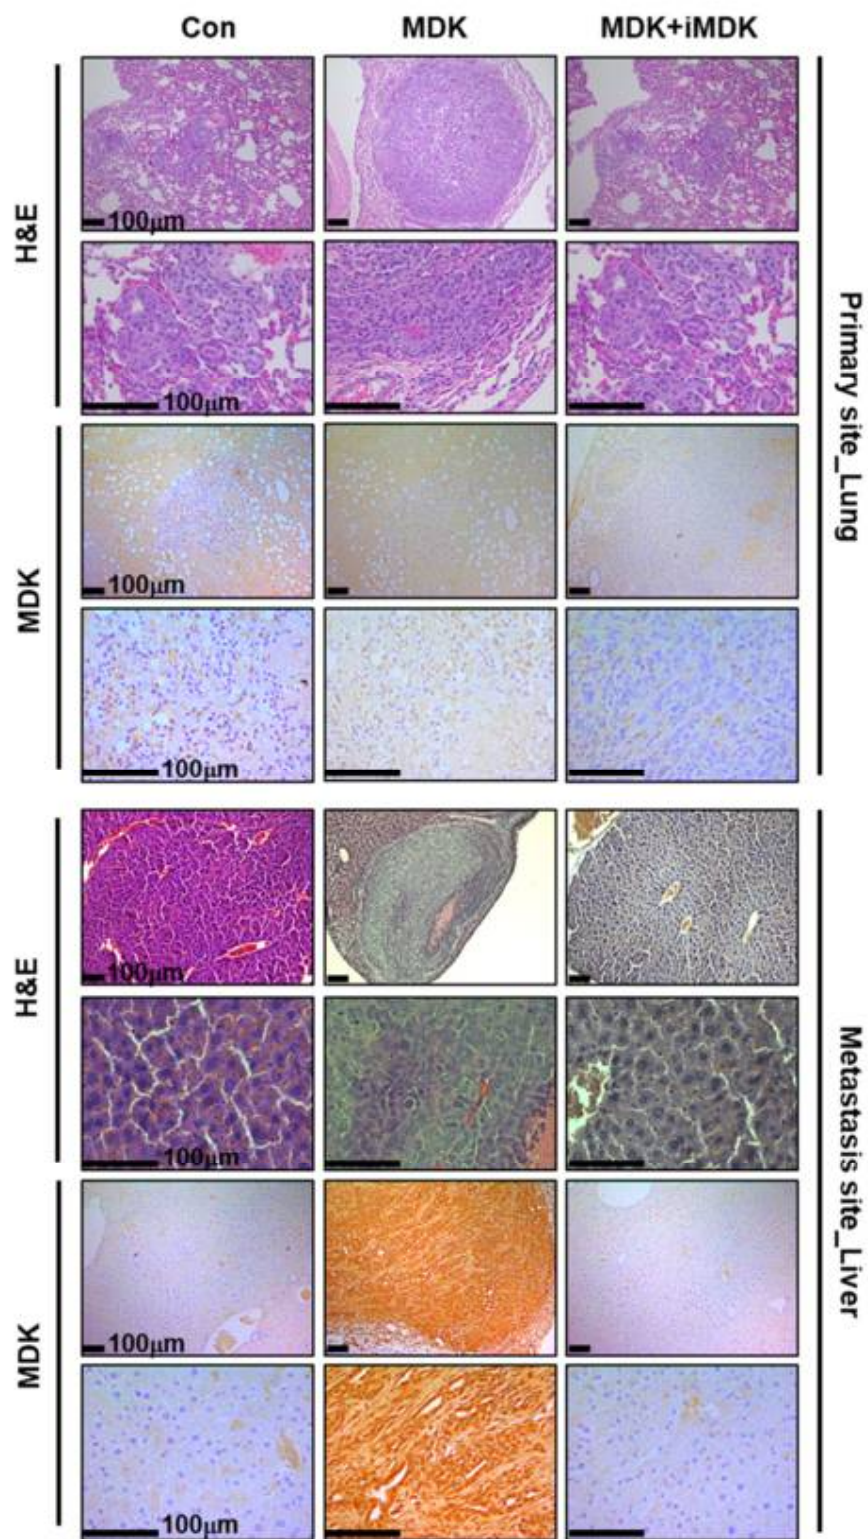

**Figure S14.** Immunohistochemical staining with H&E and MDK with primary site (lung) and metastasis site (liver) in Figure 7.

Catalog No.: NCC0720-1

| Institute              | Researcher Name | Cell Line ID | Date Received | Date Analyzed |
|------------------------|-----------------|--------------|---------------|---------------|
| National Cancer Center | Dong Hoon Shin  | NCI-H1299    | 07-17-20      | 07-24-20      |

Morphology: Epithelial

Culture properties: Adherent

Culture Method: RPMI-1640 10% FBS

Subcultivation Ratio: 1:3~1:6; Twice per week

Trypsined Time: 3-5 minutes

Results:

| Database Match Result(s) |             |                         |         |          |
|--------------------------|-------------|-------------------------|---------|----------|
|                          | Designation | Cell Number             | % Match | Database |
| 1                        | NCI-H1299   | 1x10 <sup>6</sup> cells | 100     | DSMZ     |

STR profiles:

| STR Profile | AMEL | CSF1PO | D13S317 | D16S539 | D55818 | D7S820 | TH01 | TPOX | vWA      |
|-------------|------|--------|---------|---------|--------|--------|------|------|----------|
| NCI-H1299   | X    | 12     | 12      | 12 13   | 11     | 10     | 69.3 | 8    | 16 17 18 |

Catalog No.: NCC0720-2

| Institute              | Researcher Name | Cell Line ID | Date Received | Date Analyzed |
|------------------------|-----------------|--------------|---------------|---------------|
| National Cancer Center | Dong Hoon Shin  | A549         | 07-17-20      | 07-24-20      |

Morphology: Epithelial

Culture properties: Adherent

Culture Method: F12-K/RPMI-1640 10% FBS

Subcultivation Ratio: 1:3~1:8; Twice per week

Trypsined Time: 3-5 minutes

Results:

| Database Match Result(s) |             |                         |         |          |
|--------------------------|-------------|-------------------------|---------|----------|
|                          | Designation | Cell Number             | % Match | Database |
| 1                        | A549        | 1x10 <sup>6</sup> cells | 100     | DSMZ     |

STR profiles:

| STR Profile | AMEL | CSF1PO | D13S317 | D16S539 | D55818 | D7S820 | TH01 | TPOX | vWA |
|-------------|------|--------|---------|---------|--------|--------|------|------|-----|
| NCI-H1299   | X    | 9 10   | 8       | 11 12   | 11 12  | 9 11   | 9.3  | 8 9  | 16  |

**Figure S15.** The authentication of the H1299 and A549 cell line. PCR implemented with STR multi-amplification KIT (PowerPlex™ 16HS System). No loci had tri-alleles or tetra-alleles. Contamination of other human cells was not detected. 100% matched cell line H1299 and A549 were found in both ATCC and DSMZ data banks.

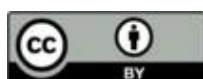

Supplement: s1 [file s1]
