# Supplementary material for: Midkine Is a Potential Therapeutic Target of Tumorigenesis, Angiogenesis, and Metastasis in Non-Small Cell Lung Cancer
Source: MDPI journal article supplement (doi:10.3390/cancers12092402), 2020-08-24

Figure 2.

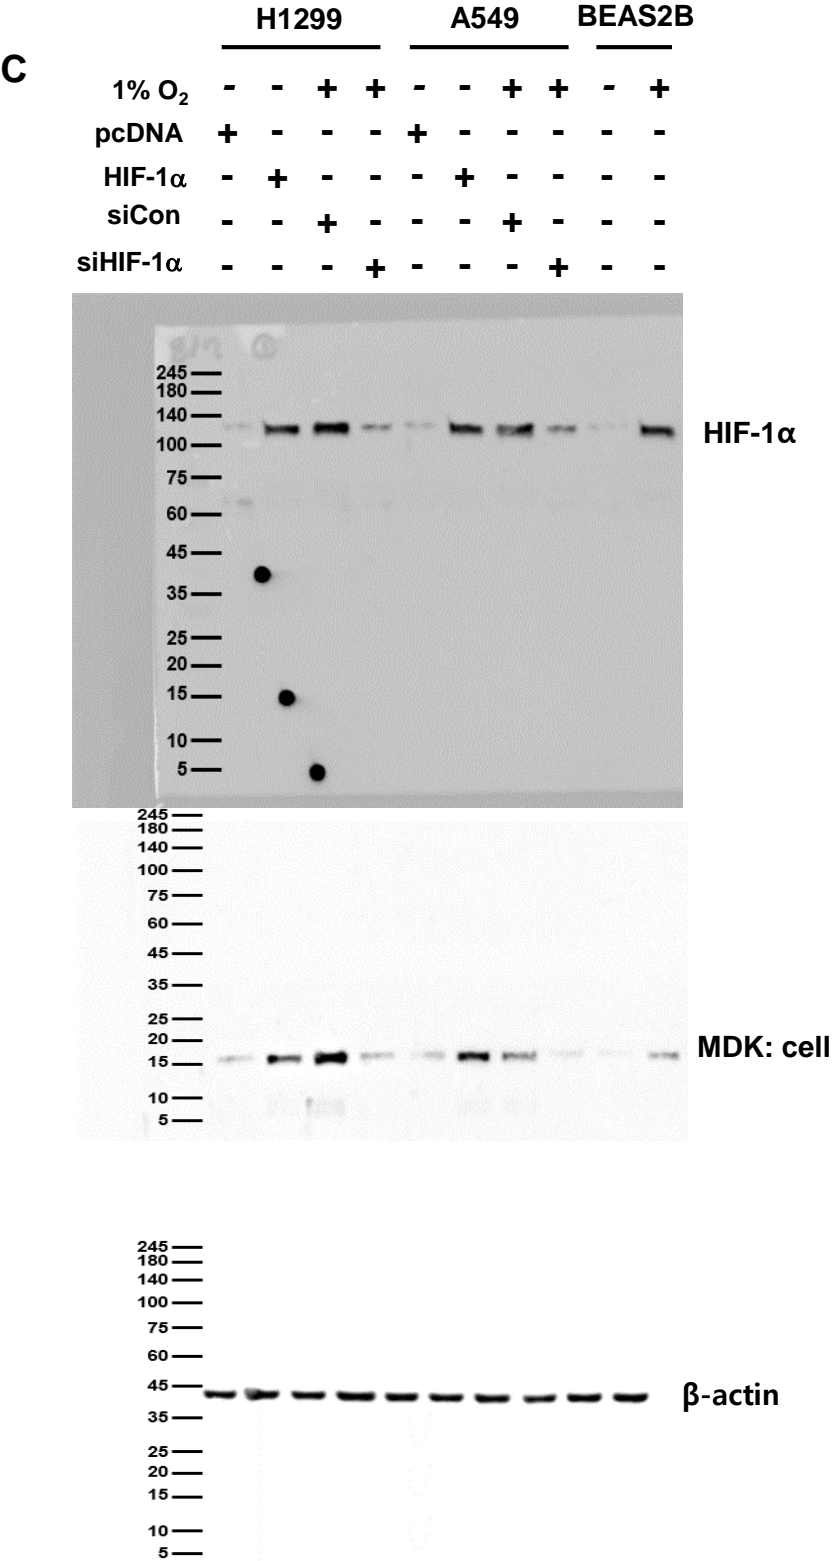

C

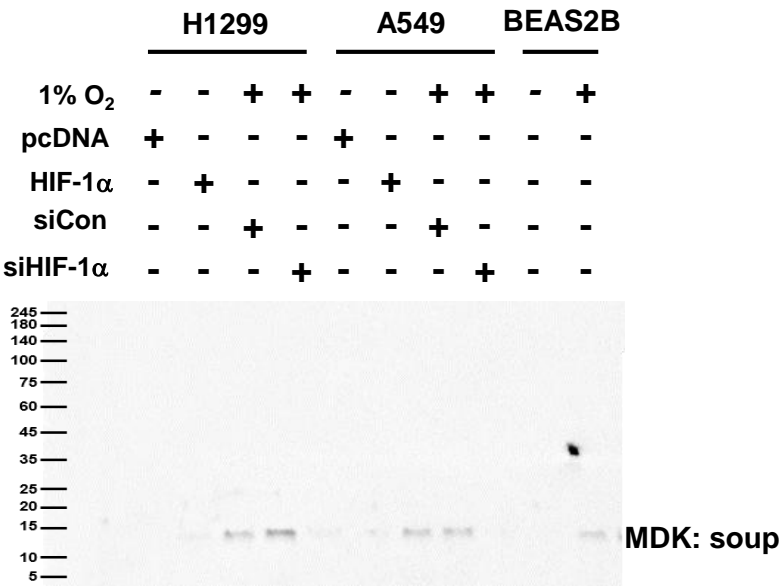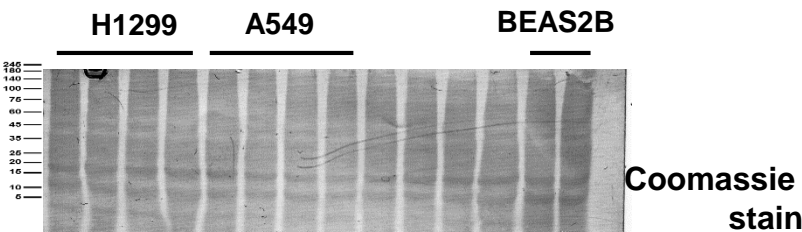

Figure 4.

B

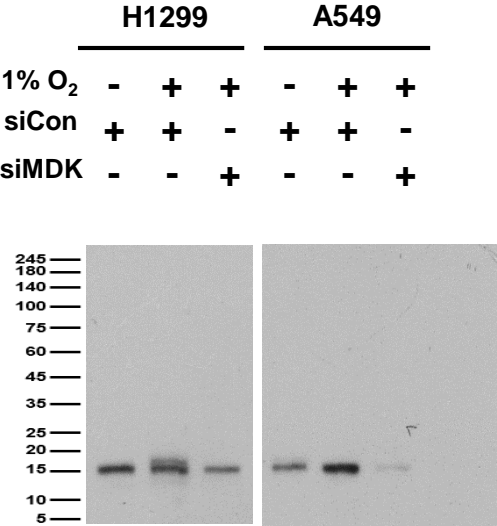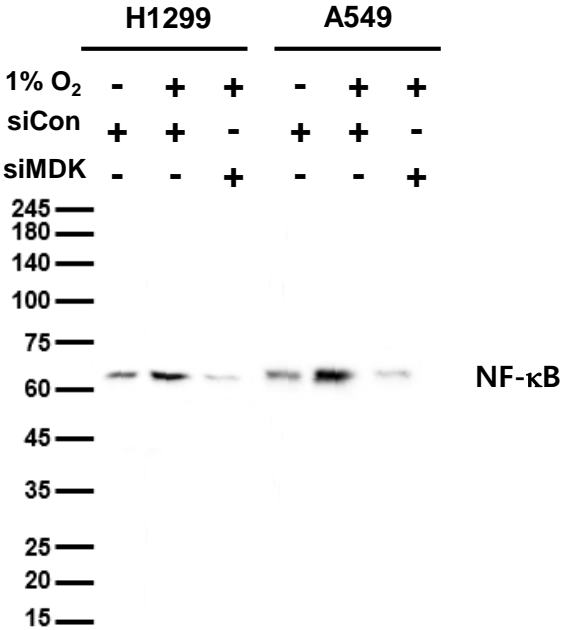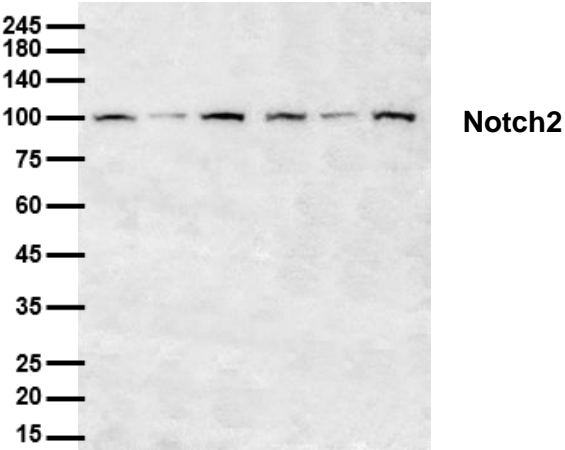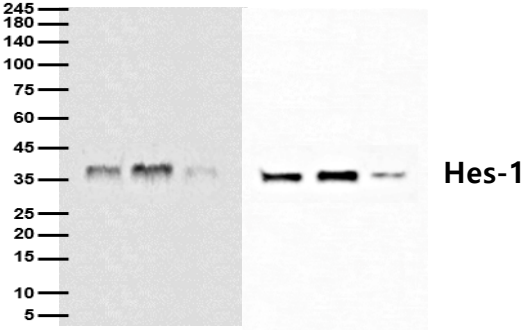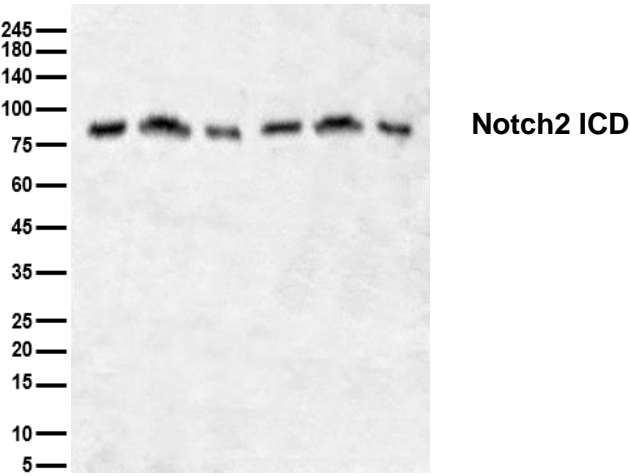

Figure 4.

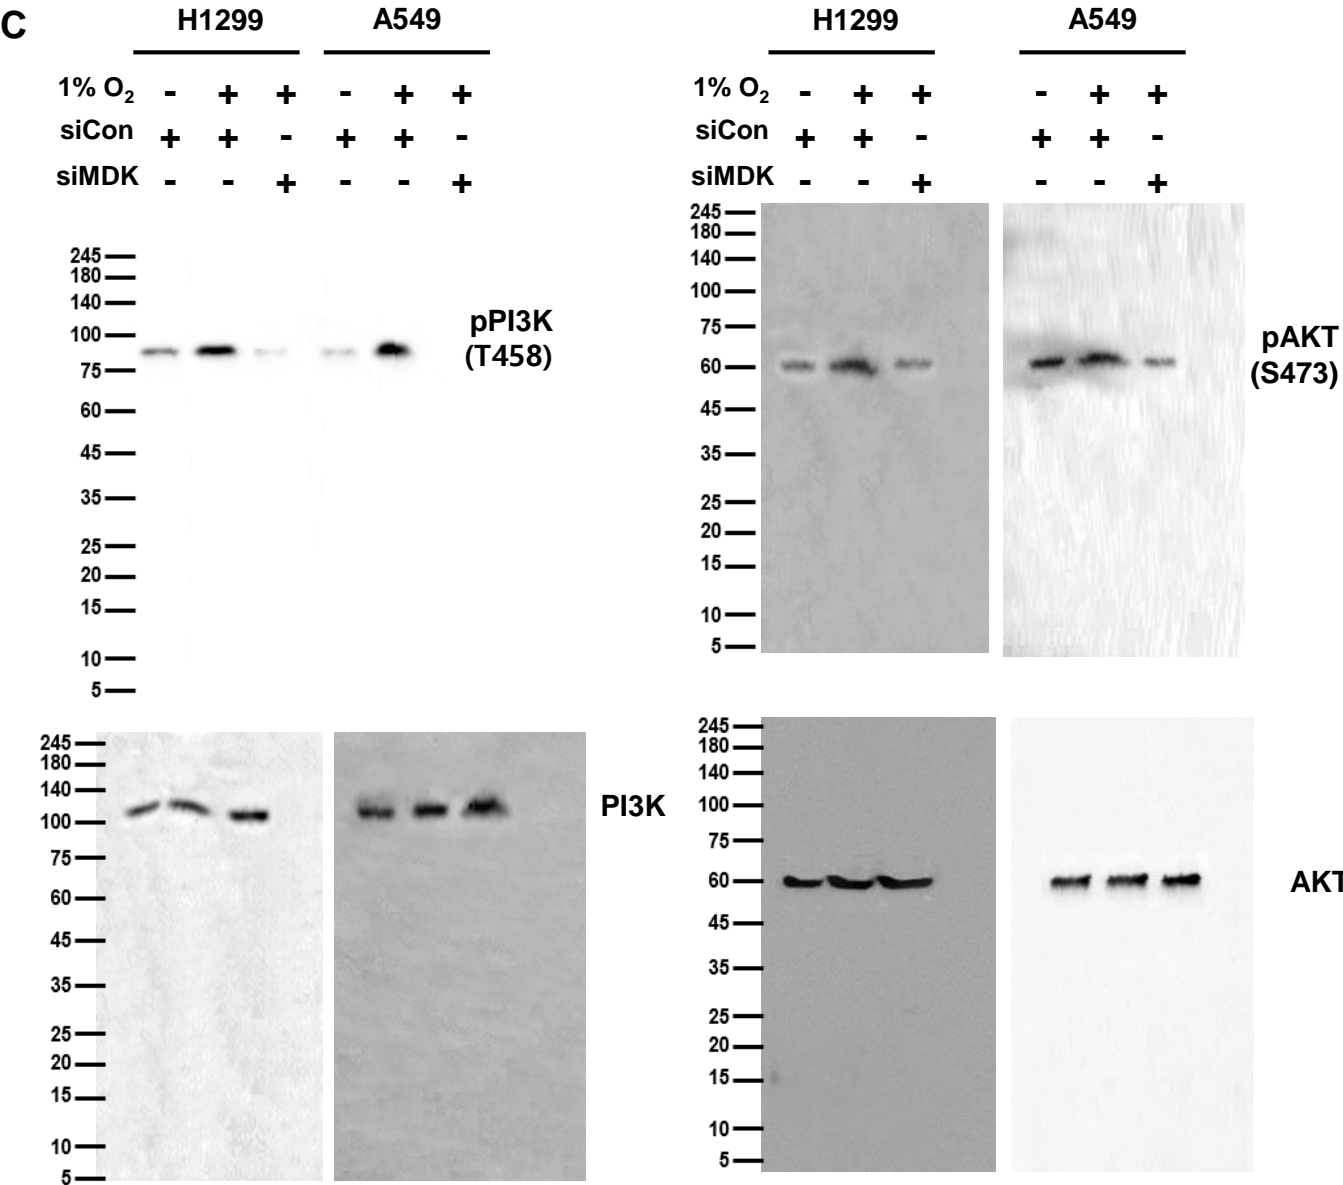

D

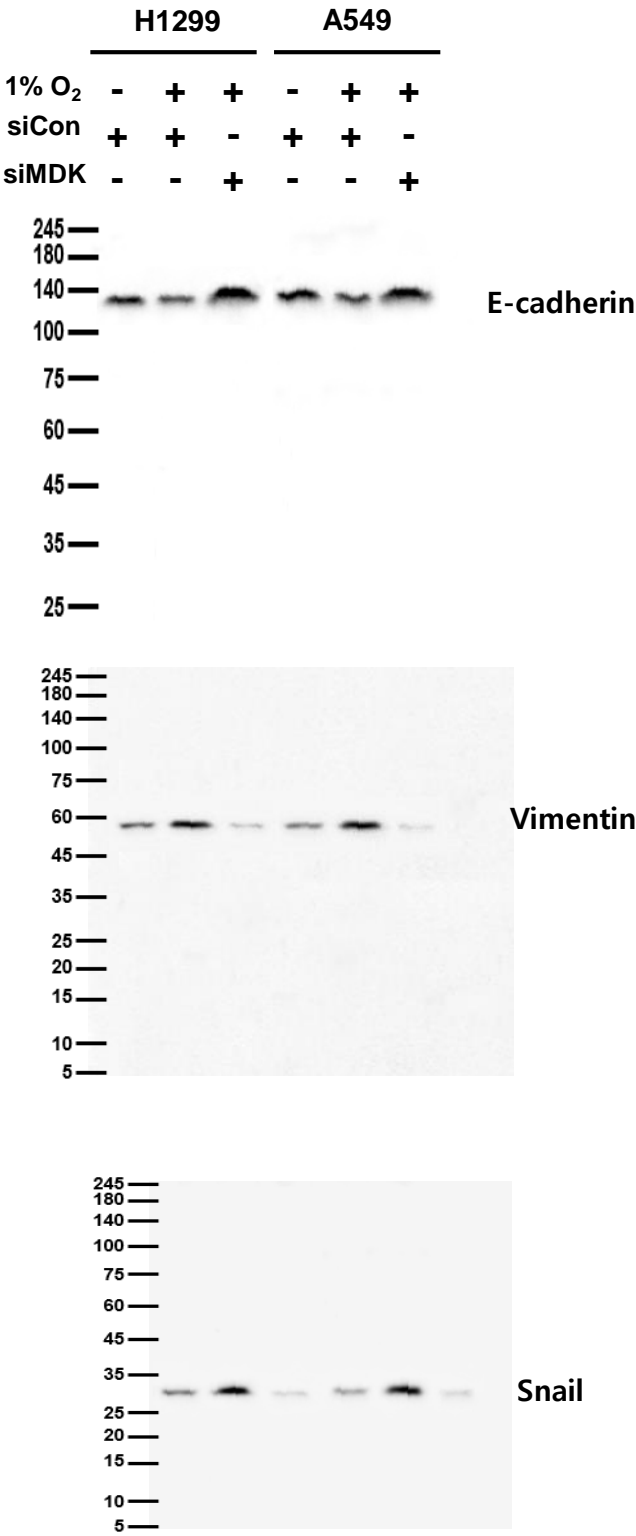

Figure 4.

E

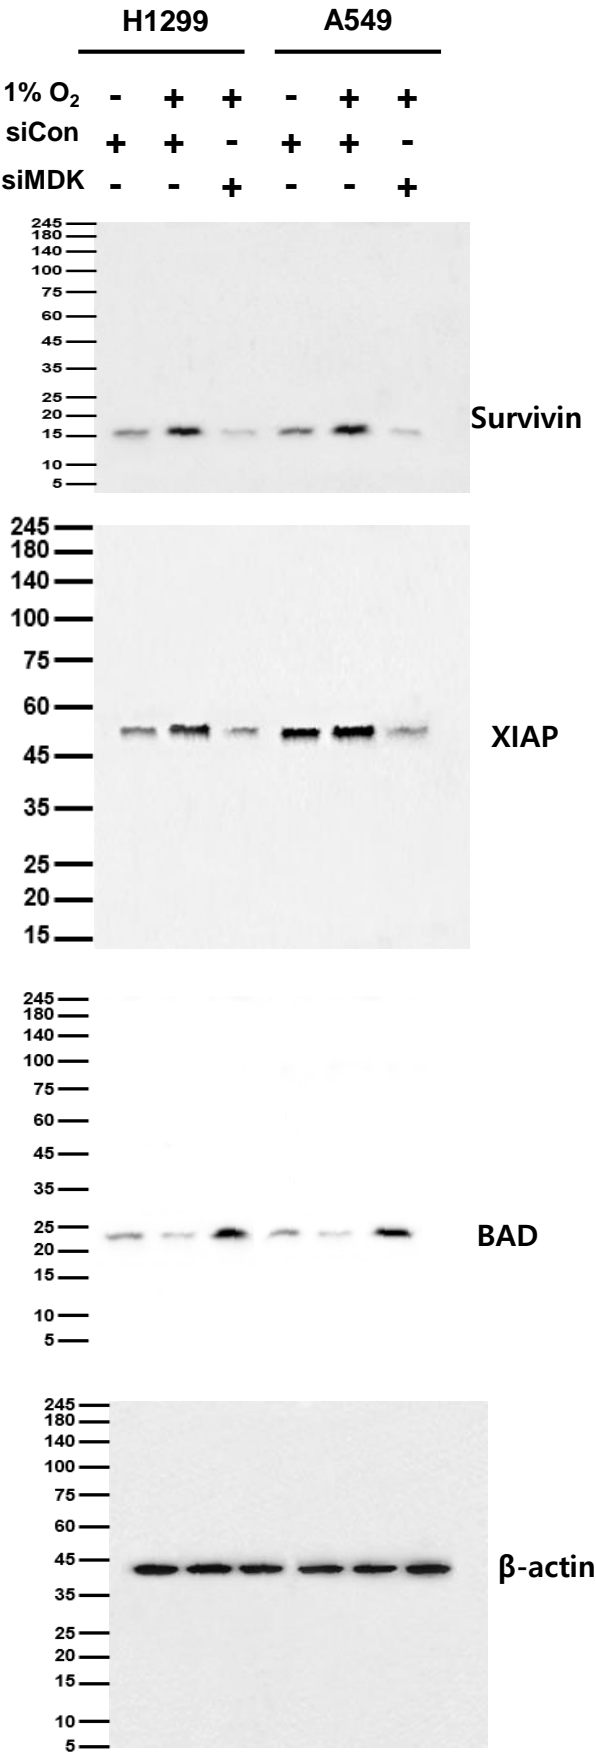

Figure S1.

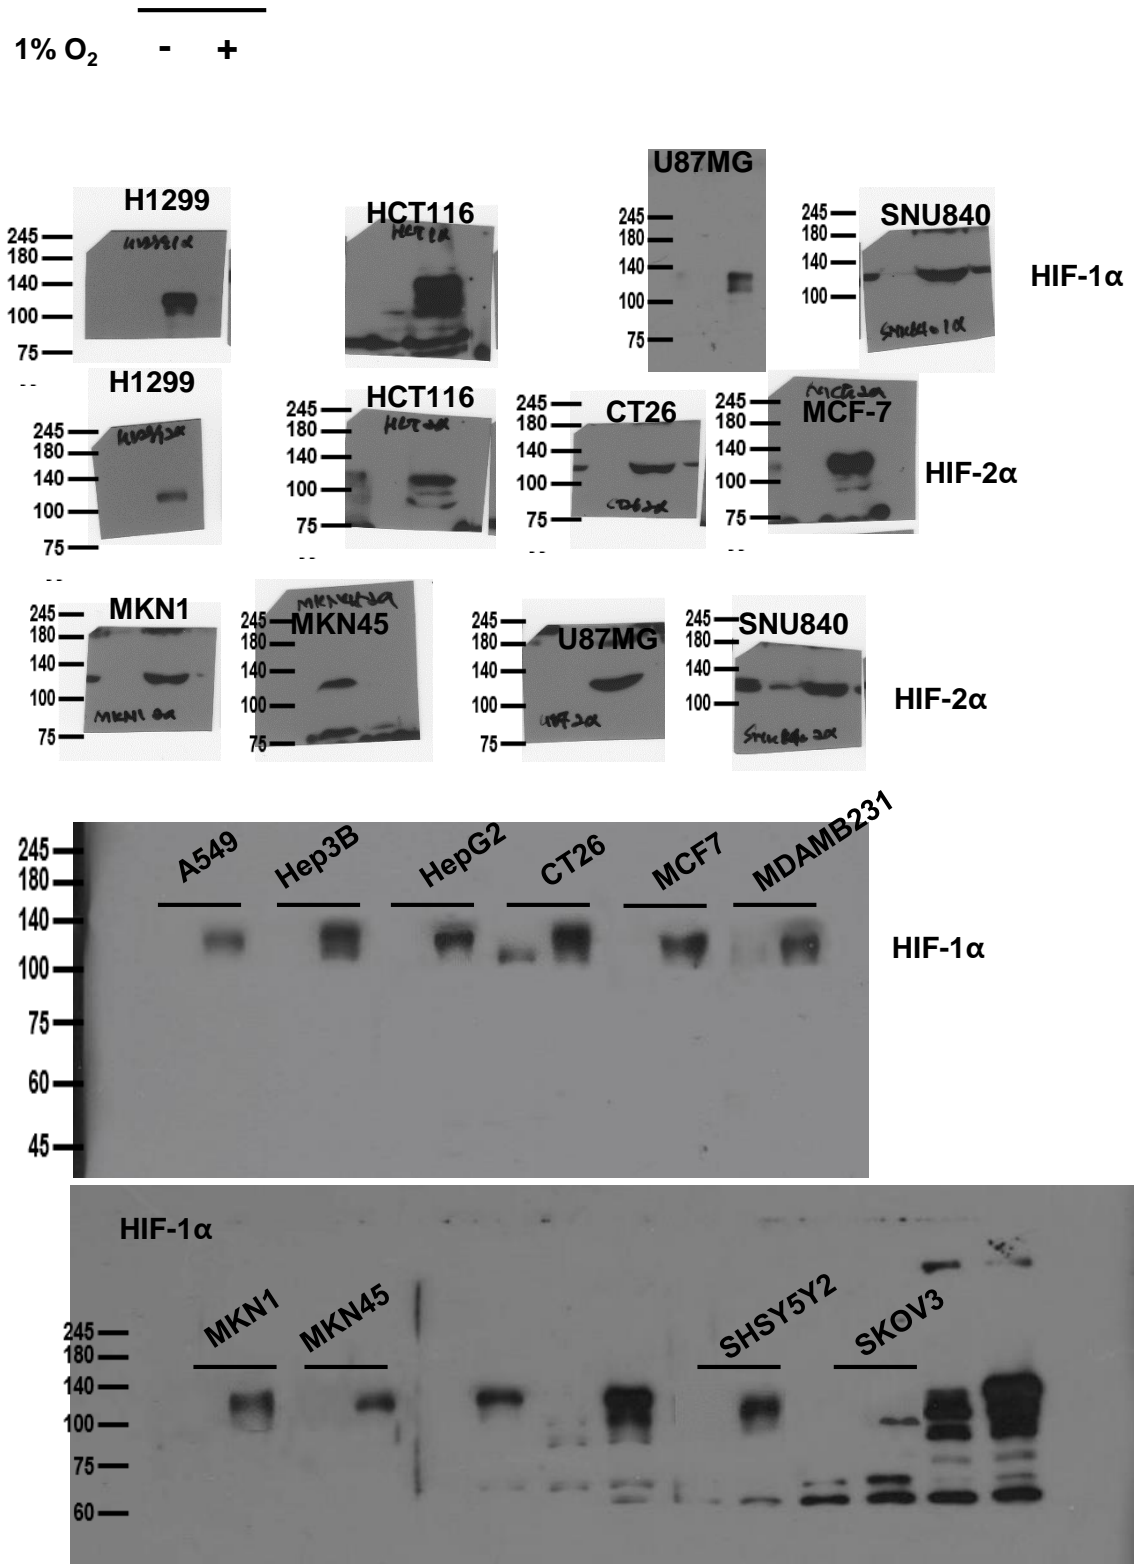

Figure S1.

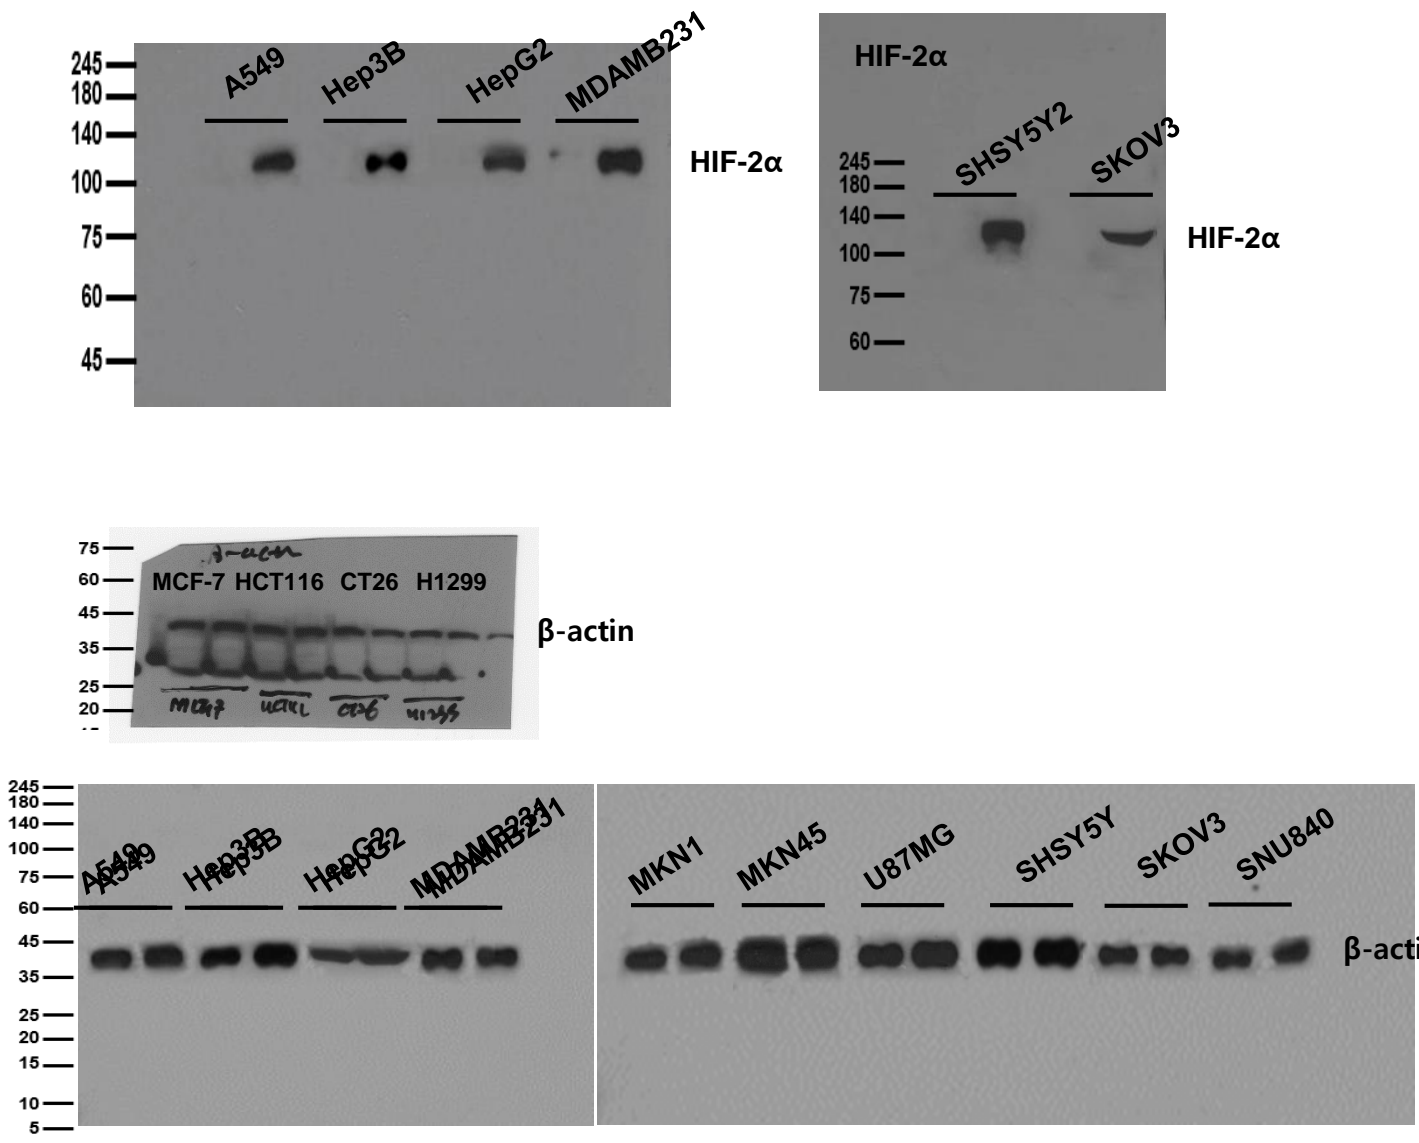



|                   |   |   |   |
|-------------------|---|---|---|
| 1% O <sub>2</sub> | - | + | + |
| siCon             | + | - | - |
| siHIF-1 $\alpha$  | - | - | + |

HIF-1 $\alpha$

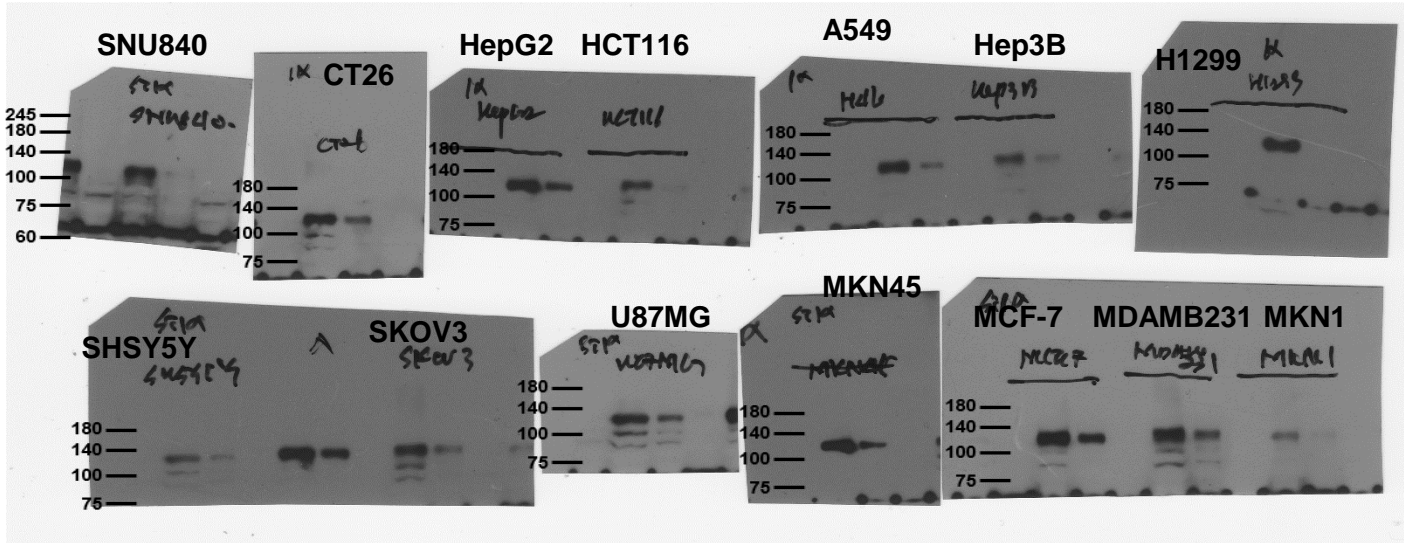

$\beta$ -actin

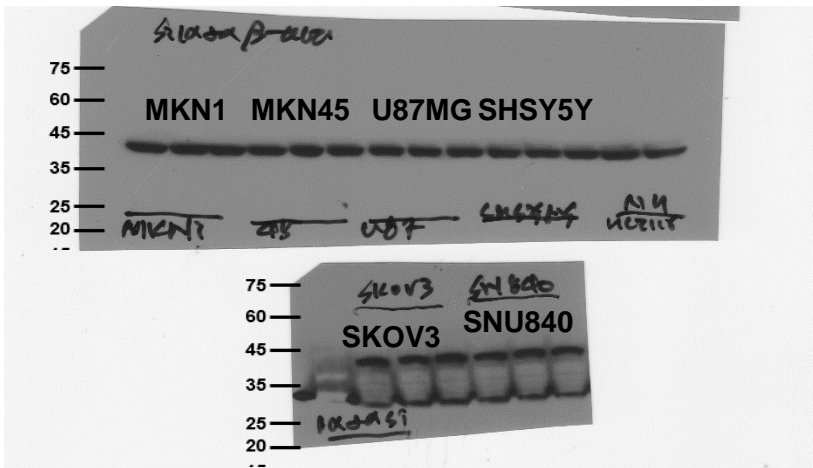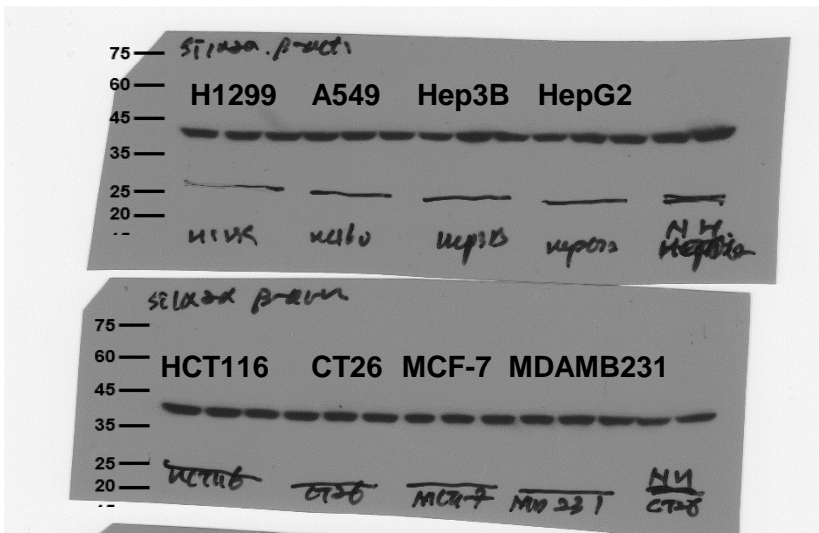

Figure S4.

|                   |   |   |   |
|-------------------|---|---|---|
| 1% O <sub>2</sub> | - | + | + |
| siCon             | + | - | - |
| siHIF-2α          | - | - | + |

HIF-2α

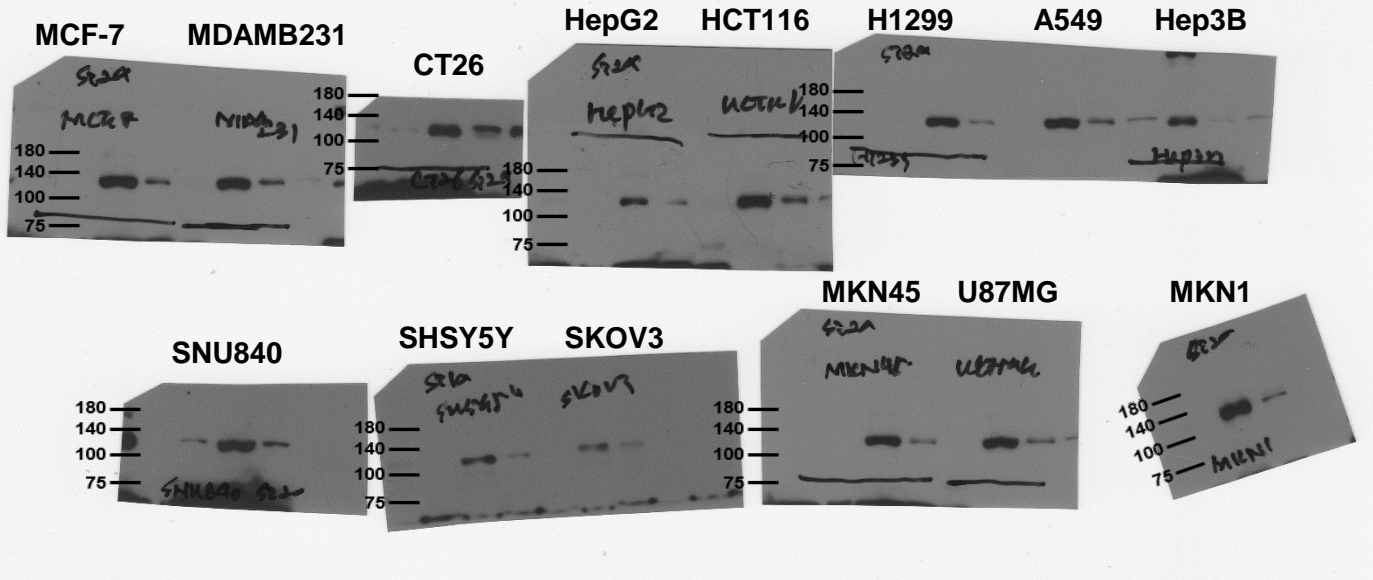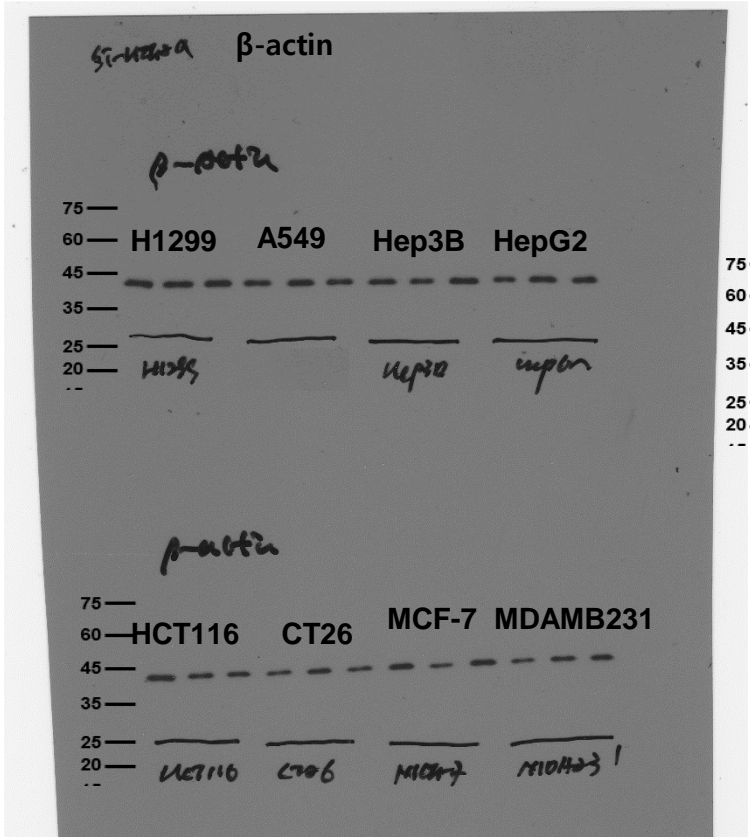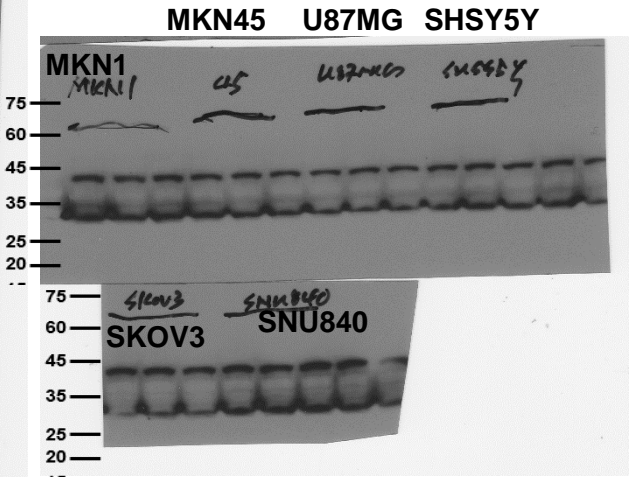

Figure S6.

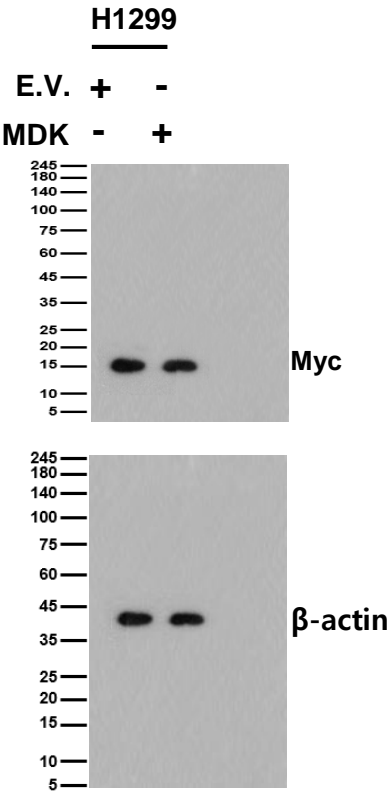

Supplement: s1 [file s1]
